# Supplementary material for: Comparison of tumors with HER2 overexpression versus HER2 amplification in HER2-positive breast cancer patients
Source: Springer Nature journal article supplement (doi:10.1186/s12885-022-09351-4), 2022-03-05
Supplement: MOESM4 [file 20195086]

**Additional file 4. Patient outcomes stratified by hormone receptor and HER2 status.**

A-B: DFS (A) and OS (B) after stratifying for hormone receptor (HR) status in 447 patients. Green and red lines indicate patients with IHC(3+) and IHC(2+)/FISH(+) tumors, respectively.

C-D: DFS (C) and OS (D) in the 314 patients who received adjuvant chemotherapies in combination with anti-HER2 drugs.

E-F: DFS (E) and OS (F) in the 129 patients who did not receive any chemotherapy.

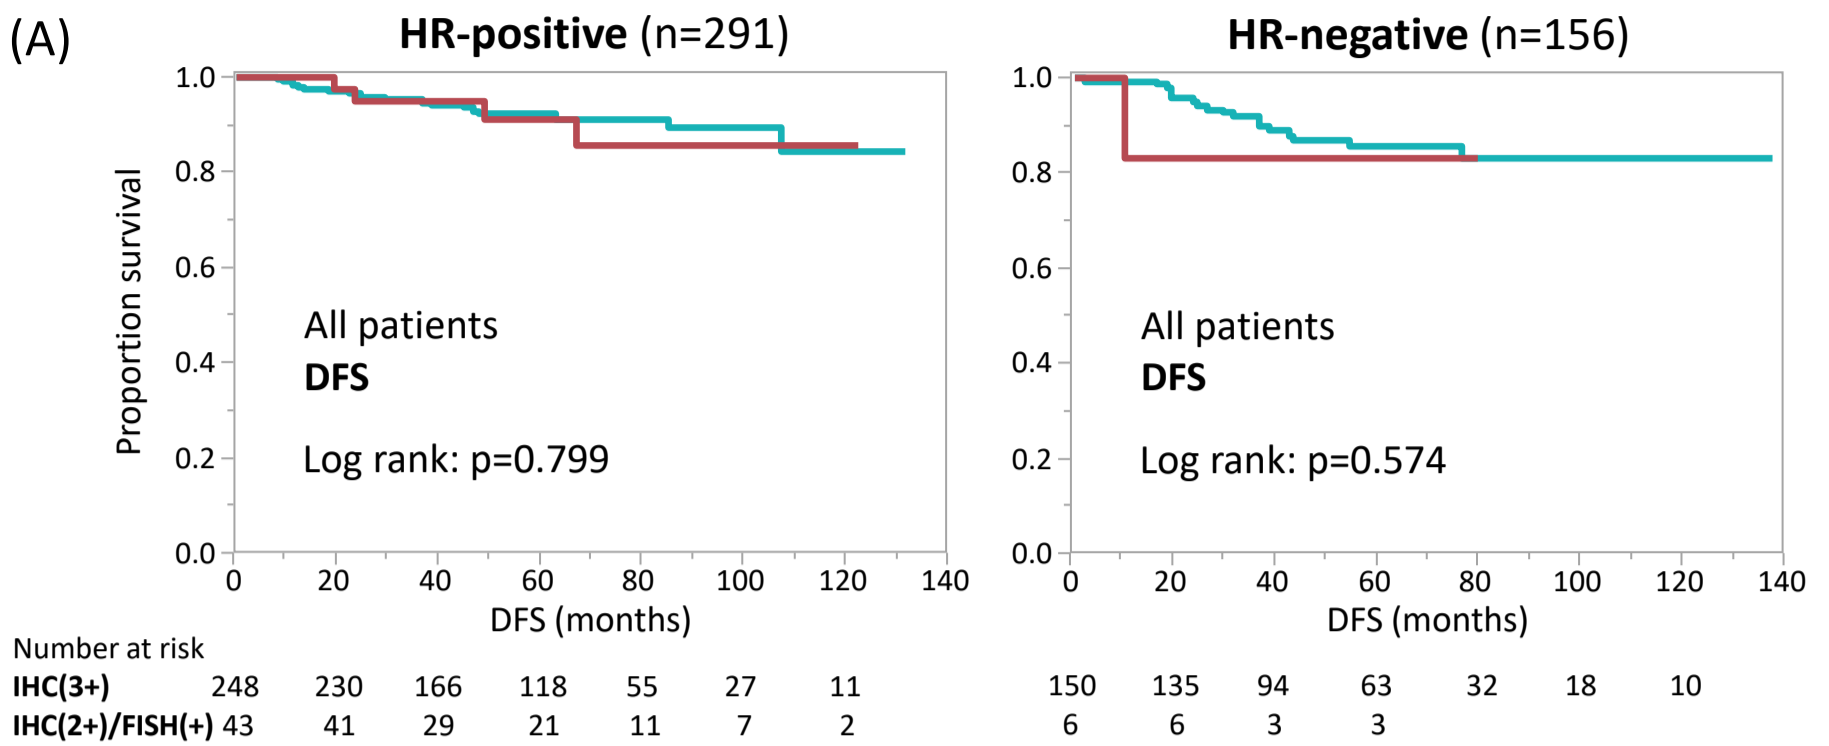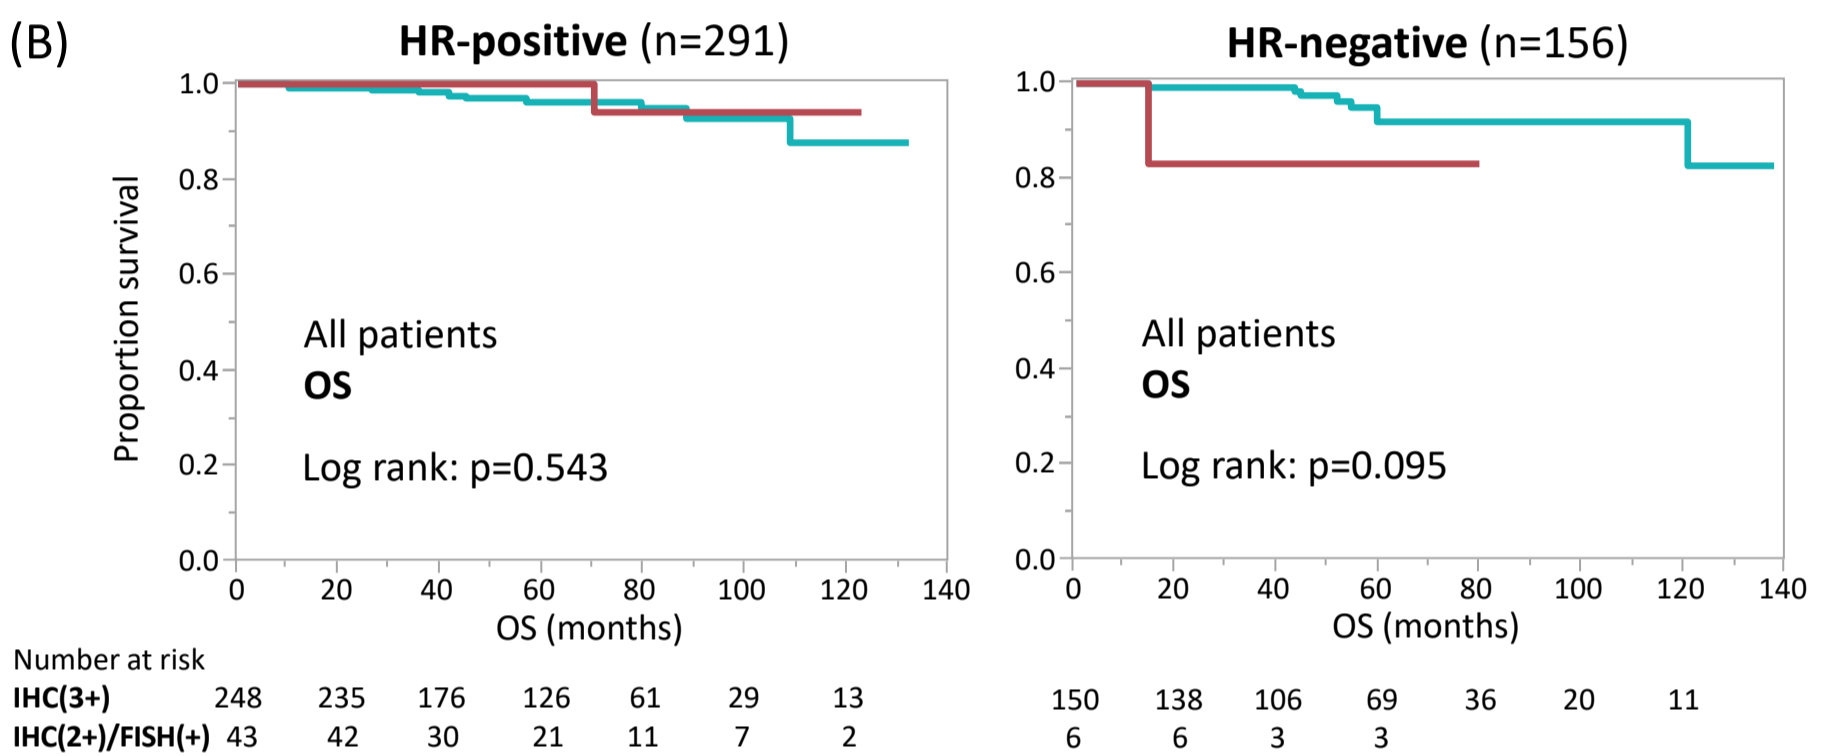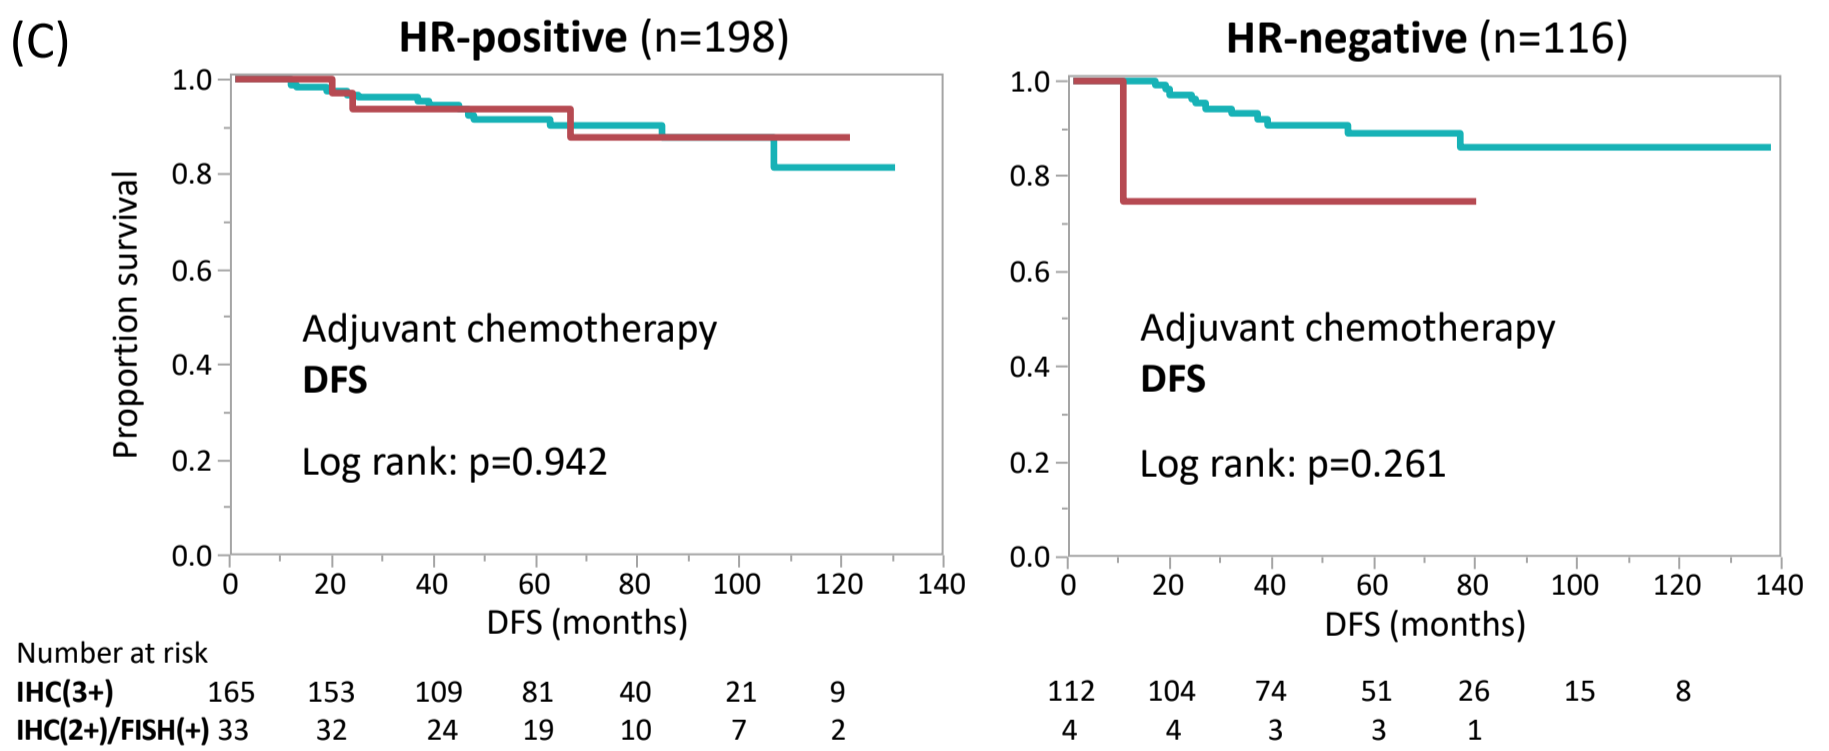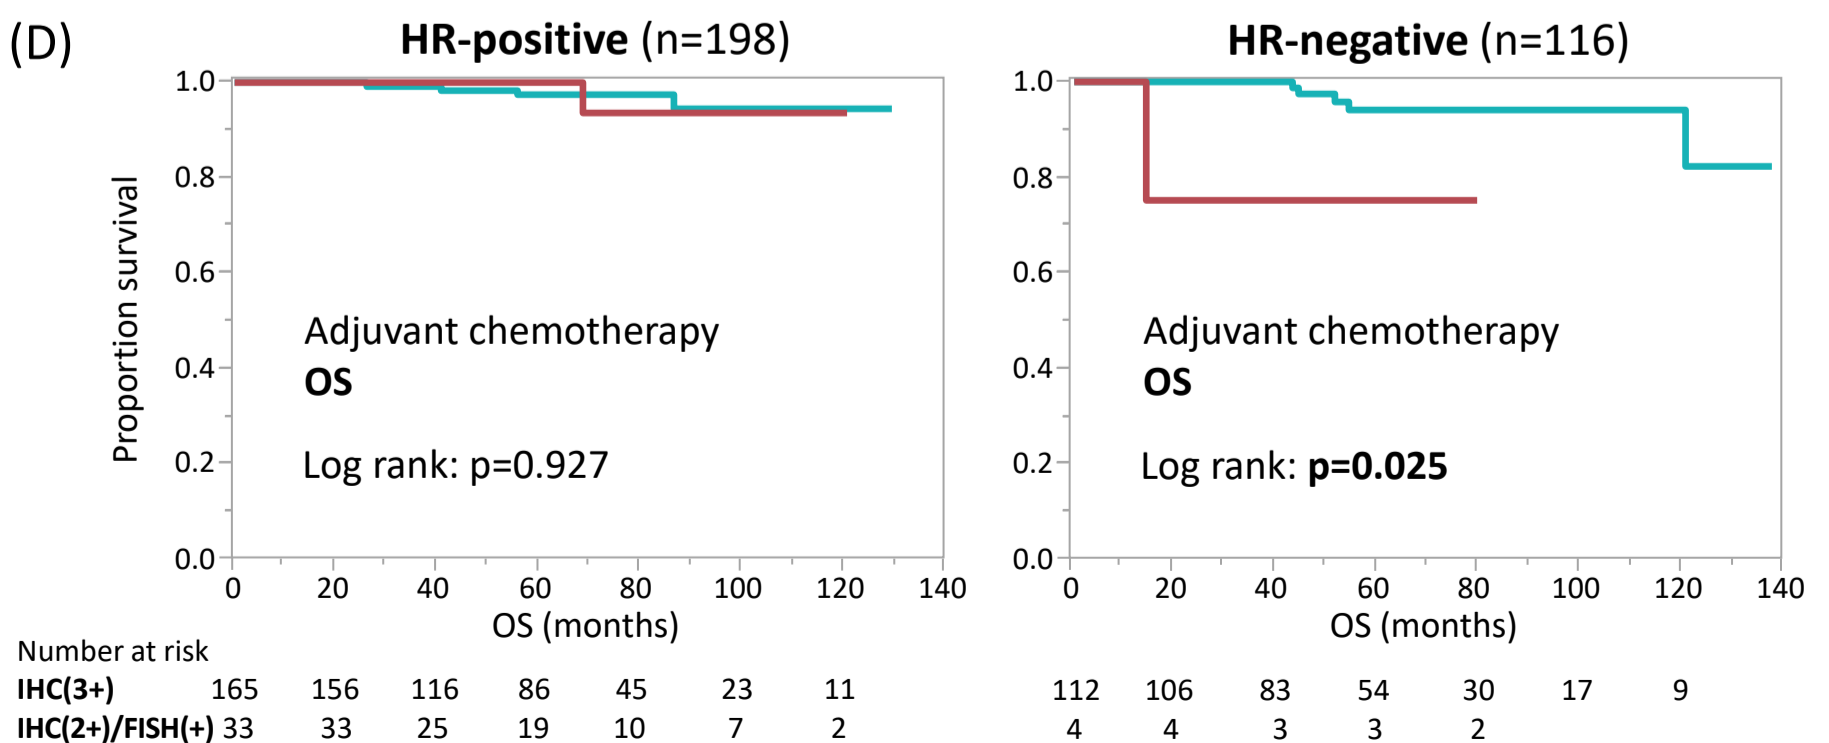

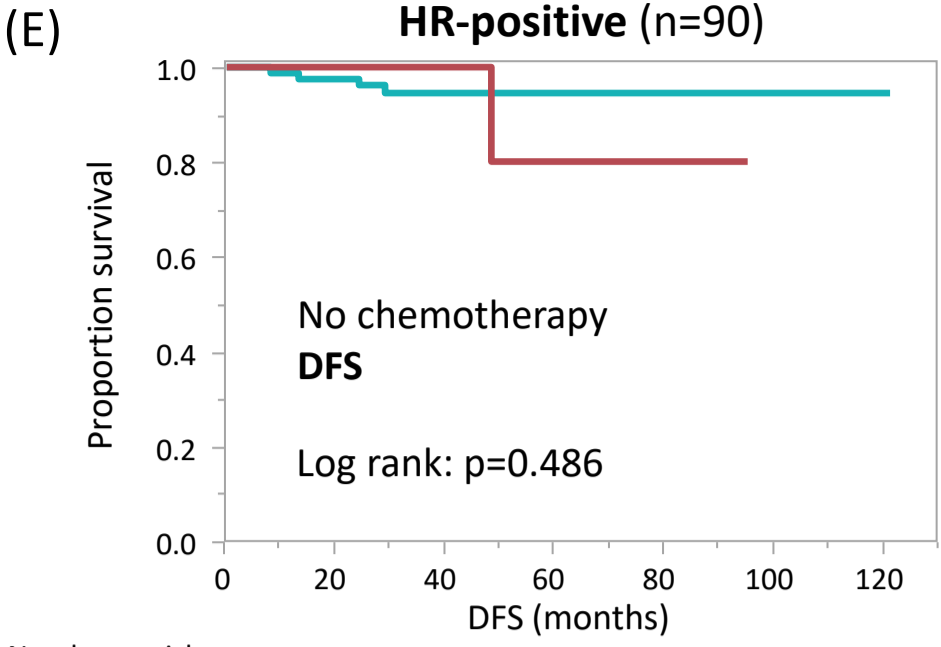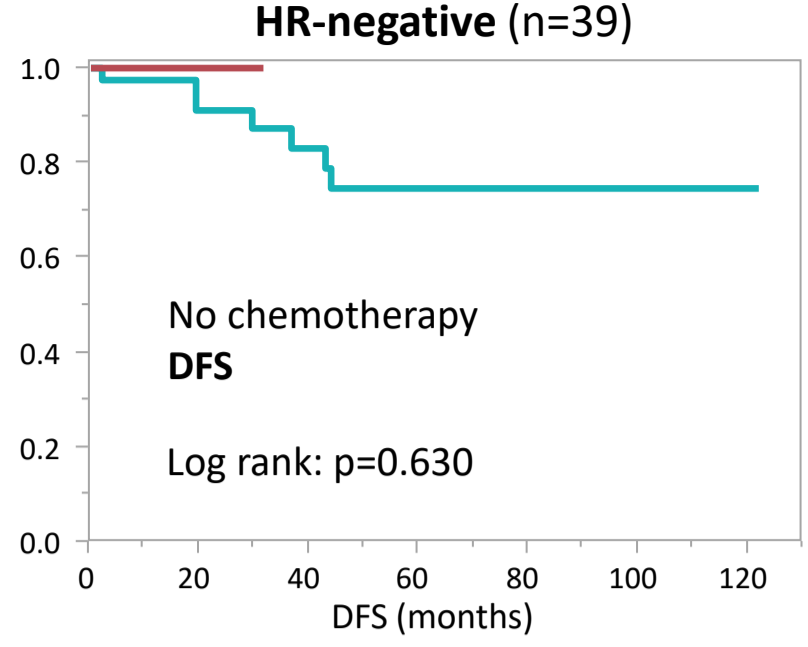

Number at risk

|                 |    |    |    |    |    |   |   |
|-----------------|----|----|----|----|----|---|---|
| IHC(3+)         | 80 | 75 | 56 | 35 | 15 | 9 | 3 |
| IHC(2+)/FISH(+) | 10 | 10 | 6  | 3  | 2  |   |   |

|  |    |    |    |    |   |   |   |
|--|----|----|----|----|---|---|---|
|  | 37 | 30 | 20 | 11 | 7 | 4 | 2 |
|  | 2  | 2  |    |    |   |   |   |

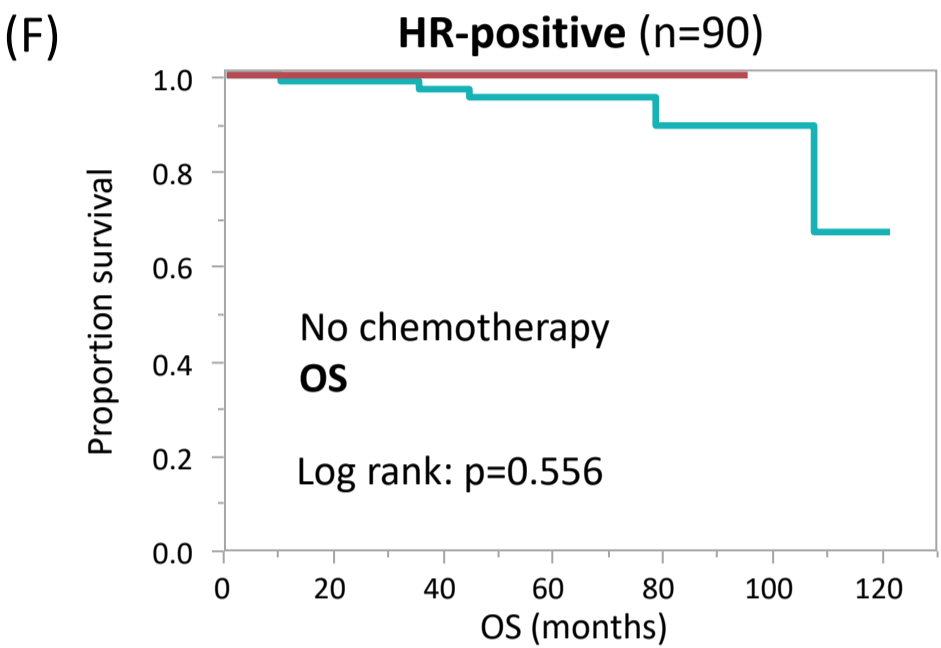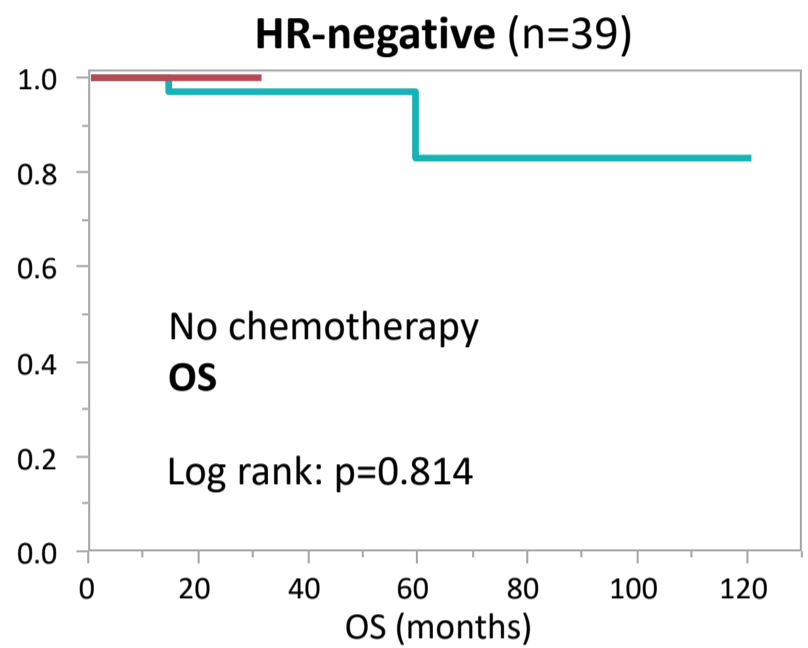

Number at risk

|                 |    |    |    |    |    |   |   |
|-----------------|----|----|----|----|----|---|---|
| IHC(3+)         | 80 | 77 | 59 | 38 | 16 | 9 | 3 |
| IHC(2+)/FISH(+) | 10 | 10 | 6  | 3  | 2  |   |   |

|  |    |    |    |    |   |   |   |
|--|----|----|----|----|---|---|---|
|  | 37 | 32 | 24 | 14 | 7 | 4 | 2 |
|  | 2  | 2  |    |    |   |   |   |
